# Supplementary material for: Innate immune responses yield tissue-specific bottlenecks that scale with pathogen dose
Source: PubMed Central journal article supplement (PMC10500177; doi:10.1073/pnas.2309151120), 2023-09-05
Supplement: pnas.2309151120.sapp.pdf [file pnas.2309151120.sapp.pdf]

1 **Supporting Information**

2  
3 **Materials and Methods**

4  
5 Ethics Statement

6 All animal experiments were conducted in accordance with the recommendations in the Guide for the  
7 Care and Use of Laboratory Animals of the National Institutes of Health and the Animal Welfare Act of  
8 the United States Department of Agriculture using protocols reviewed and approved by Brigham and  
9 Women's Hospital Committee on Animals (Institutional Animal Care and Use Committee protocol number  
10 2016N000416 and Animal Welfare Assurance of Compliance number A4752-01)

11  
12 Bacterial culture

13 The *E. coli* strain used in this study was CHS7, derived from strain CFT073 (1). All experiments used a  
14 barcoded library of CHS7(2). Bacteria were routinely plated on LB + 50 µg/ml kanamycin agar plates for  
15 CFU enumeration.

16  
17 Animal Experiments

18 The TLR4<sup>KO</sup>/TLR4<sup>Het</sup> colony was established by crossing TLR4<sup>KO</sup> males (Jackson stock #029015) with  
19 C57Bl/6J (Jackson stock #000664) females. TLR4<sup>Het</sup> female offspring were crossed with TLR4<sup>KO</sup> males  
20 to generate experimental TLR4<sup>KO</sup> and TLR4<sup>Het</sup> littermates. Animals were bred in a Biosafety Level 1  
21 helicobacter-free facility at the Brigham and Women's Hospital. At 7-8 weeks of age, animals were  
22 transferred to a Biosafety Level 2 room. At 8-10 weeks old, animals (males and females) were inoculated  
23 intravenously with the barcoded library of CHS7. The bacterial inoculum was prepared by thawing small  
24 frozen aliquots of a master lot of barcoded CHS7 and diluting directly in PBS. To prepare the inoculum  
25 containing killed bacteria, frozen aliquots were diluted in 4% paraformaldehyde and incubated at room  
26 temperature for 20 minutes. Cells were centrifuged, washed in PBS, and resuspended in 1ml of PBS,  
27 after which live bacteria were added. The 100µl inoculum was delivered intravenously via the lateral tail  
28 vein with a 27G needle while animals were restrained in a Broome-style restrainer (Plas Labs). A heating  
29 pad was used to facilitate dilation of the tail vein. At 5 days post inoculation, mice were euthanized with  
30 isoflurane and cervical dislocation, after which the lungs, spleen, and liver were harvested. Prior to  
31 harvesting the liver, the bile was aspirated, and the gallbladder was removed. Organs were homogenized  
32 by bead beating with two 3.2mm stainless steel beads for two minutes in PBS.

33  
34 STAMPR analysis

35 1ml of organ homogenates were plated on 150mm agar plates. Note that liver samples were  
36 homogenized in a total of 4ml, but only 1ml was plated for STAMPR analysis. To accurately compare  
37 CFU and FP values, all liver CFU values reported in this study are for ¼ of the liver. Colonies were picked  
38 or lawns were scraped into PBS + 25% glycerol and stored at -80° C.

39  
40 To amplify the barcode region, cell suspensions were diluted ~1:50 in water, or up to 1:10 if cell density  
41 was low (i.e., few CFU in the organ). Diluted suspensions were boiled (95°C for 15 min) and 3µl was  
42 used for PCR as previously described, with minor modifications (3). PCR reactions were performed with  
43 2x OneTaq HotStart DNA Polymerase master mix (New England Biolabs), using 6 µl of forward and  
44 reverse primer (1µM each). The forward primers were designed such that the first nucleotides to be  
45 sequenced were a region of variable length to facilitate optimal color balancing. These variability regions  
46 also contained sequence diversity for multiplexing and demultiplexing. Reverse primers contained i7  
47 indexes from the TruSeq DNA PCR Free kit (Illumina). PCR reactions were run on agarose gels to verify  
48 amplification, pooled, and then purified using the GeneJet PCR purification kit. Amplicons were quantified  
49 with Qubit and sequenced as 1 x 78 nt reads on MiSeq or NextSeq 1000 instruments (Illumina)

51 Reverse primer demultiplexing with i7 was performed on BaseSpace (Illumina), and forward primer  
52 demultiplexing was performed using custom R scripts. Demultiplexed reads (.fastq files) were trimmed  
53 and mapped to a previously defined list of reference barcodes using CLC genomics workbench. Read  
54 count tables, where columns specify the sample and rows specify the barcode, were exported as .csv  
55 files and used for subsequent analysis. For samples sequenced on a NextSeq 1000, we included an  
56 additional index hopping correction. For each sample  $n_0$ , we identified every other sample  $n_i$  that was  
57 separated by only one index. Barcode counts were combined for all  $n_i$  samples, multiplicatively scaled,  
58 and subtracted from sample  $n_0$ . No more than 3% of reads were removed from any sample.  
59

60 Founding population size was approximated by calculation of  $N_s$ , which is defined as the number of times  
61 the input library must be sampled from a multinomial distribution to observe a given number of barcodes.  
62  $N_s$  calculation was performed as previously described(3, 4) . Briefly, read count tables were first  
63 converted to frequencies. To identify noise thresholds, we first identified large gaps in barcode frequency  
64 between sorted barcodes (greater than 10-fold) as well as breaks that delineate sub-populations as  
65 defined by the STAMPR algorithm (described extensively in (5)). All barcodes below the frequency  
66 threshold were defined as noise and set to 0 reads.  $N_s$  was calculated by first resampling the input library  
67 to the read depth of the output sample. The resulting distribution was then iteratively resampled from 1  
68 to ~10,000 times. A sampling size of ~10,000 is sufficient to detect all ~1000 barcodes in the library and  
69 defines the maximum resolution of  $N_s$ . A “reference resample curve” was generated, where the x-axis  
70 is the number of times sampled ( $N_s$ ) and the y-axis is the number of barcodes detected. The number of  
71 barcodes in each sample after noise thresholding was used as input for inverse interpolation from the  
72 reference resample curve to calculate  $N_s$ .  
73

#### 74 Statistics

75 Linear regression in Figure 1 was performed in GraphPad Prism. This study assumes that curves are  
76 linear, but it is possible that with a substantially larger number of replicates a nonlinear fit would be a  
77 more appropriate approximation of the dose-FP trend (6). The  $5 \times 10^4$  dose was excluded from linear  
78 regression analysis in the liver, since 7 animals had 0 CFU and 4 animals had 1 CFU. Statistical  
79 significance in Figure 2 was assessed using Brown-Forsythe and Welch ANOVA tests followed by  
80 Dunnett’s T3 multiple comparisons test (GraphPad Prism).  
81

#### 82 **References**

- 85 1. Welch RA, Burland V, Plunkett G, Redford P, Roesch P, Rasko D, Buckles EL, Liou S-R, Boutin  
86 A, Hackett J, Stroud D, Mayhew GF, Rose DJ, Zhou S, Schwartz DC, Perna NT, Mobley HLT,  
87 Donnenberg MS, Blattner FR. 2002. Extensive mosaic structure revealed by the complete  
88 genome sequence of uropathogenic Escherichia coli. Proc Natl Acad Sci U S A 99:17020–4.
- 89 2. Hullahalli K, Waldor MK. 2021. Pathogen clonal expansion underlies multiorgan dissemination  
90 and organ-specific outcomes during murine systemic infection. Elife 10:e70910.
- 91 3. Campbell IW, Hullahalli K, Turner JR, Waldor MK. 2023. Quantitative dose-response analysis  
92 untangles host bottlenecks to enteric infection. Nature Communications 2023 14:1 14:1–13.
- 93 4. Fakoya B, Hullahalli K, Rubin DHF, Leitner DR, Chilengi R, Sack DA, Waldor MK. 2022.  
94 Nontoxicogenic Vibrio cholerae Challenge Strains for Evaluating Vaccine Efficacy and Inferring  
95 Mechanisms of Protection. mBio 13:e0053922.
- 96 5. Hullahalli K, Pritchard JR, Waldor MK. 2021. Refined Quantification of Infection Bottlenecks and  
97 Pathogen Dissemination with STAMPR. mSystems 6:e00887-21.
- 98 6. Gillman AN, Mahmutovic A, Abel zur Wiesch P, Abel S. 2021. The Infectious Dose Shapes Vibrio  
99 cholerae Within-Host Dynamics. mSystems 6:e00659-21.

100
